1           **The Host Interactome of Spike Expands the Tropism of SARS-CoV-2**

2

3           Casimir Bamberger, Sandra Pankow, Salvador Martínez-Bartolomé, Jolene Diedrich,  
4                                                       Robin Park, and John Yates III

5

6           Department of Molecular Medicine, The Scripps Research Institute, La Jolla, CA, USA.

7

8

9

10

11

12

13

14

15

16

17

18          To whom correspondence should be addressed:

19          *Tom Casimir Bamberger*  
20          cbamberg@scripps.edu  
21          10550 North Torrey Pines Road, SR302  
22          The Scripps Research Institute  
23          La Jolla, CA 92037  
24          United States

25  
26          *John Robert Yates III*  
27          jyates@scripps.edu  
28          10550 North Torrey Pines Road, SR302  
29          The Scripps Research Institute  
30          La Jolla, CA 92037  
31          United States

1 **Abstract**

2 The SARS-CoV-2 virus causes severe acute respiratory syndrome (COVID-19) and has  
3 rapidly created a global pandemic. Patients that survive may face a slow recovery with  
4 long lasting side effects that can afflict different organs. SARS-CoV-2 primarily infects  
5 epithelial airway cells that express the host entry receptor Angiotensin Converting  
6 Enzyme 2 (ACE2) which binds to spike protein trimers on the surface of SARS-CoV-2  
7 virions. However, SARS-CoV-2 can spread to other tissues even though they are  
8 negative for ACE2. To gain insight into the molecular constituents that might influence  
9 SARS-CoV-2 tropism, we determined which additional host factors engage with the viral  
10 spike protein in disease-relevant human bronchial epithelial cells (16HBE<sup>o-</sup>). We found  
11 that spike recruited the extracellular proteins laminin and thrombospondin and was  
12 retained in the endoplasmatic reticulum (ER) by the proteins DJB11 and FBX2 which  
13 support re-folding or degradation of nascent proteins in the ER. Because emerging  
14 mutations of the spike protein potentially impact the virus tropism, we compared the  
15 interactome of D614 spike with that of the rapidly spreading G614 mutated spike. More  
16 D614 than G614 spike associated with the proteins UGGT1, calnexin, HSP7A and  
17 GRP78/BiP which ensure glycosylation and folding of proteins in the ER. In contrast to  
18 G614 spike, D614 spike was endoproteolytically cleaved, and the N-terminal S1 domain  
19 was degraded in the ER even though C-terminal 'S2 only' proteoforms remained  
20 present. D614 spike also bound more laminin than G614 spike, which suggested that  
21 extracellular laminins may function as co-factor for an alternative, 'S2 only' dependent  
22 virus entry. Because the host interactome determines whether an infection is  
23 productive, we developed a novel proteome-based cell type set enrichment analysis  
24 (pCtSEA). With pCtSEA we determined that the host interactome of the spike protein  
25 may extend the tropism of SARS-CoV-2 beyond mucous epithelia to several different  
26 cell types, including macrophages and epithelial cells in the nephron. An 'S2 only'  
27 dependent, alternative infection of additional cell types with SARS-CoV-2 may impact  
28 vaccination strategies and may provide a molecular explanation for a severe or  
29 prolonged progression of disease in select COVID-19 patients.

30

31

32 **Keywords:** SARS-CoV-2 strains, proteome analysis, protein folding, protein quality  
33 control, extracellular matrix, bottom up mass spectrometry, virus variants, CoPIT,  
34 bioinformatic analysis of proteomes, virus host interactions, coronavirus, biochemical  
35 reaction networks, virus replication, structural biology modeling, cellular microbiology,  
36 protein folding, unfolded protein response, cell ontology, brain tissue, monocytes, mast  
37 cells, dendritic cells, astrocytes, oligodendrocytes, megakaryocytes, muscle, fibroblasts,  
38 emerging spike variants

## 1 Introduction

2 The novel  $\beta$ -coronavirus SARS-CoV-2 emerged in 2019, spread rapidly and has created  
3 a global pandemic. While SARS-CoV-2 shows DNA sequence similarity to SARS-CoV<sup>1</sup>  
4 and to the bat  $\beta$ -coronavirus RaTG13, the infectivity of SARS-CoV-2 and zoonosis in  
5 humans was likely caused by an alteration in virus to host protein-protein  
6 interactions. A small number of very specific  $\beta$ -coronavirus to host protein interactions  
7 are required to infect human cells and complete replication. A comparison of the SARS-  
8 CoV-2 genome with the RaTG13 genome shows that only a few changes in the amino  
9 acid sequence of the virus entry protein (the spike protein) may have enabled SARS-  
10 CoV-2 infection and transmission in humans<sup>1</sup>.

11 The virus to host interactome determines the virus' infectivity and thus, tropism. In  
12 SARS-CoV-2, the receptor binding domain (RBD) of the spike protein binds to the host  
13 receptor human angiotensin converting enzyme 2 (ACE2) to initiate virus  
14 entry<sup>2,3</sup>. Upon binding, high levels of the endoprotease TMPRSS2 cleave the spike  
15 protein (S) at the second polybasic cleavage site into S1 and S2' to allow for membrane  
16 fusion. Once endocytosed, S2' mediated fusion of the virion with the endosomal  
17 membrane releases the viral RNA genome into the host cytoplasm<sup>4</sup>. Both ACE2 and  
18 TMPRSS2 are expressed in cells of the upper airways (bronchia and trachea), digestive  
19 tract (esophagus, ileum, colon, gallbladder) and common bile duct<sup>5</sup> where they confer  
20 high transmissibility, which may enable SARS-CoV-2 to linger in patients with long-  
21 lasting side effects that are not fully explained<sup>6</sup>. It is also possible that a substantial  
22 number of SARS-CoV-2 cell infections occur without ACE2/TMPRSS2-mediated cell  
23 entry, albeit with much lower infectivity<sup>4,7</sup>. An alternate cell entry may occur when  
24 cathepsins B/L in the lysosome cleave spike priming it for membrane fusion<sup>8</sup>. Since  
25 the spike protein decorates SARS-CoV-2 virions as trimers, the proteoform composition  
26 of mature spike trimers likely determines the mechanism and specificity of any  
27 alternative, ACE2/TMPRSS2 independent cell entry. However, the precise role of spike  
28 proteoforms and their host interactomes in alternative paths for cell entry is unknown.

29 Open reading frames (ORF) that are encoded in the viral RNA genome are translated  
30 into virus proteins which replicate and efficiently pack the viral genome into nascent viral  
31 particles and support the egress of mature virus particles<sup>9</sup>. Indeed, the virus  
32 interactome is primarily derived from virus-virus rather than virus-host interactions<sup>10</sup>,  
33 and interactions with host proteins might be actively avoided to prevent any impairment  
34 of virus particle formation. However, individual viral proteins target cellular proteins to  
35 ward off detection by the immune system<sup>11</sup> or to nudge the cellular translation  
36 machinery towards a preferential translation of viral RNA transcripts<sup>12</sup>. Additionally, the  
37 host interactome coordinates glycosylation<sup>13,14</sup>, endoproteolytic cleavage<sup>15</sup>, and  
38 trimerization<sup>16</sup> of the maturing spike protein which in turn influences selectivity and  
39 efficiency of viral cell entry in the next infection cycle<sup>17</sup>.

## SARS-CoV-2 tropism

C. Bamberger *et al.*

1 Here, we identified the virus to host interactome of select SARS-CoV-2 ORFs in human  
2 bronchial epithelial 16HBEo<sup>-</sup> cells<sup>18</sup>. We devised a novel proteome-based cell type set  
3 enrichment analysis (pCtSEA) from the frequently used gene set enrichment analysis  
4 (GSEA) in transcriptomics<sup>19-21</sup>, and revealed an expanded tropism of SARS-CoV-2  
5 based on the host interactome of the spike protein. Several cell types that we identified  
6 are ACE2 negative but might harbor a proteome that allows infection with SARS-CoV-  
7 2. Further, we compared the host interactome of the D614 spike protein with the host  
8 interactome of the G614 spike. G614 yields approximately 5 fold more spike protein per  
9 mature virus particle than D614<sup>22</sup> which increases transmissibility and infectivity<sup>23</sup>;  
10 however, the mutation does not influence the severity of COVID-19 symptoms. Here  
11 we show that host proteins in 16HBEo<sup>-</sup> cells processed D614 less efficient than G614  
12 spike proteoforms. The differential processing of spike revealed that host interactors  
13 bound to the spike proteoform S2 might be important for an alternative virus cell entry.

## 14 Results

15 15 of the 28 open reading frames (ORFs) in SARS-CoV-2 were expressed in human  
16 bronchial epithelial cells (16HBEo<sup>-</sup>). Bronchial epithelial cells serve as the main entry  
17 point of the virus into the lower respiratory tract and also provide the first line of defense  
18 against viral respiratory infections<sup>24</sup>. We performed immunoprecipitations of the  
19 2xStrep tagged viral proteins (Gordon *et al.*<sup>25</sup>) and controls (2xStrep-GFP and MOCK)  
20 in biological triplicates and measured each in technical duplicates, yielding a total of 166  
21 mass spectrometry experiments (Data availability). Bait proteins with interactors were  
22 immunoprecipitated using the CoPIT<sup>26</sup> method and digested with the endoprotease  
23 trypsin. The resulting peptides were bound to C18 reversed phase resin (PepSep) and  
24 separated by high pressure liquid chromatography (Evosep). Peptide identification with  
25 a timsTOFpro mass spectrometer (Bruker) and data analysis with SAINTexpress<sup>27</sup>  
26 (Sum SpC ≥ 5, detection in ≥ 3 replicate experiments, and ≥ 5 fold above background)  
27 resulted in an interactome comprising 15 viral and 189 host proteins (Figure 1A,  
28 Extended data network 1, Supplementary data 1). 41 of 189 (22%) host proteins  
29 interacted with more than one virus protein. Unique host-virus interactions were  
30 detected for 12 of the 15 viral proteins: orf3a (2 host proteins), orf9b (5), E (1), orf7a (2),  
31 nsp2 (2), nsp7 (3), nsp10 (5), or nsp13 (3). Nsp5-C145A, orf7b, orf8, and M protein  
32 each recruited more than 10 unique host proteins. The spike protein associated with  
33 4 unique human proteins (TR150, LAMC2, FBX2, ERH) in addition to LAMB3, CALX,  
34 and TSP1 which were also enriched in immunoprecipitations with M and orf7b. None of  
35 the human proteins that bound to nsp9 and N were unique to either viral protein.

36 The overlap of the host proteins with two recently published host interactomes in human  
37 embryonic kidney HEK293 cells<sup>25</sup> and lung carcinoma A549 cells<sup>28</sup> (Figure 1B) was  
38 minimal. Common to all three interactomes were the endolysosomal trafficking proteins  
39 VSP39 (orf3a) and RAB14 (orf9b) as well as the chloride channel CLCC1, which might

## SARS-CoV-2 tropism

C. Bamberger *et al.*

1 be involved in regulation of the unfolded protein response (UPR) <sup>29</sup>, and the  
2 mitochondrial import receptor TOM70, which is targeted by orf9b to suppress type 1  
3 interferon responses <sup>11</sup>. The cell lines 16HBEo<sup>-</sup> and A549 are lung airway derived, and  
4 the overlap (26 proteins, 2.5 %) was larger than between 16HBEo<sup>-</sup> and HEK293  
5 (9 proteins, 1.8 %). Therefore, we conclude that very specific virus to host protein  
6 interactions exist and that the extended virus-host interactome depends on the cellular  
7 proteome and cell type in which SARS-CoV-2 proteins were expressed. The few  
8 common SARS-CoV-2 host-virus protein-protein interactions are most likely necessary  
9 for successful virus replication.

### 10 ***The SARS-CoV-2 spike interactome in 16HBEo<sup>-</sup> cells***

11 Because the spike protein is required for successful infection, we analyzed the host  
12 interactome of spike in more detail. Two interactors, laminin-β3 (LAMB3) and laminin-γ2  
13 (LAMC2), are extracellular glycoproteins that may impact virus cell entry or, conversely,  
14 may be functionally impaired upon SARS-CoV-2 infection. Locally confined skin  
15 blistering has been detected in conjunction with SARS-CoV-2 infection and in the  
16 presence of spike protein <sup>30</sup>, and functional impairment of laminin-β3 or laminin-γ2 can  
17 cause skin blistering (epidermolysis bullosa) <sup>31,32</sup> or failure of nephrons in the kidney  
18 (Pierson syndrome) <sup>33,34</sup>. Laminin-β3 can serve as co-receptor for the entry of Vaccinia  
19 virus or HPV into human cells <sup>35,36</sup>.

20 We further found that spike binds to thrombospondin-1 (TSP1). TSP1 is present in the  
21 extracellular space and ER, and is involved in the mucosal innate immune  
22 response <sup>37</sup>. TSP1 includes a C-terminal L-lectin binding domain <sup>38</sup> which may  
23 competitively inhibit a subsequent viral infection of cells as observed for  
24 HIV <sup>39</sup>. Increased levels of TSP1 induce the unfolded protein response (UPR) <sup>40</sup>. Key  
25 to the UPR is the ER chaperone GRP78/BiP (HSPA5), which also binds to the spike  
26 protein. GRP78/BiP might facilitate infection of epithelial cells with SARS-CoV-2 as  
27 observed for the related β-coronavirus MERS-CoV <sup>41</sup>.

28 The extended spike interactome included DJB11. DJB11 is a co-chaperone of  
29 GRP78/BiP which binds to nascent polypeptides and stimulates GRP78/BiP dependent  
30 protein folding in the ER, or targets misfolded proteins to ERAD <sup>42</sup>. Spike proteins also  
31 interacted with calnexin (CALX), which retains glycoproteins in the ER that require  
32 refolding. Calnexin was previously found to bind to the C-terminus of SARS-CoV spike  
33 protein <sup>43</sup>. The F-box only protein 2, FBX2, binds N-glycosylated proteins with high-  
34 mannose oligosaccharides as part of the SKP1-CUL1-F-box E3 ligase protein  
35 complex <sup>44</sup> and targets glycoproteins to the ERAD. For example, FBX2 degrades the  
36 viral glycoprotein of the Epstein Barr virus (EBV), limiting infection of epithelial cells <sup>45</sup>.

### 37 ***Differences between the interactome of spike G614 to D614***



## SARS-CoV-2 tropism

C. Bamberger *et al.*

1 After a zoonosis, viruses continue to adapt to a new host by acquiring additional  
2 mutations in the virus entry protein sequence mainly to either evade the host's immune  
3 response or increase transmissibility. To gain insight into whether host interactors of  
4 the spike protein are altered in different SARS-CoV-2 strains, we determined the host  
5 interactome of D614G mutated spike. Mammalian expression vectors with C-terminal  
6 single or N- and C-terminal double flag tagged D614 or G614 spike cDNA were  
7 transiently transfected into 16HBE<sup>-</sup> cells and spike protein was immunoprecipitated  
8 48 h later. Host interactors of D614 spike protein were directly compared to host  
9 interactors of G614 spike protein with CoPIT<sup>26,46</sup> (Table 1). G614 spike associated with  
10 SRP72 and high mobility group proteins (HMG). G614 but not D614 spike bound the  
11 signal recognition particle 72 (SRP72) which regulates cellular translation of membrane  
12 proteins. SRP72 relocates the translation complex with the nascent polypeptide from  
13 the cytoplasm to the rER. High mobility group proteins HMGB1 bound to G614 spike  
14 preferentially and HMGN2 or HMGB2 bound exclusively. High mobility group proteins  
15 are involved in a range of cellular pathways from proliferation to inflammation, and  
16 extracellular accumulation of HMGB1 stimulates the innate immune response to HCV<sup>47</sup>.

17 D614G mutation altered the stoichiometry of the main proteoforms of spike. Spike  
18 proteoforms include S, the N-terminal S1 and the C-terminal S2 or S2' fragment which  
19 result from endoproteolytic cleavage at the first polybasic (furin) or second (TMPRSS2)  
20 cleavage site, respectively (Figure 2A). S1 was below the level of detection in D614  
21 spike expressing cells, whereas the mutation D614G prevented degradation of S1 and  
22 stabilized the ratio of S1 : S2 at close to 1:1, as described previously<sup>22</sup> (Figure 2B). S2  
23 was present in similar amounts to S (S2:S ~ 1:1) in both D614 and G614 spike  
24 expressing cells.

25 We found that heat shock cognate 71 kDa protein (HSP7C), calnexin (CALX), and UDP-  
26 glucose:glycoprotein glucosyltransferase 1 (UGGT1) were enriched by a factor of two or  
27 more in D614 over G614 spike immunoprecipitations despite the absence of S1 in D614  
28 spike expressing 16HBE<sup>-</sup> cells (Table 1). In addition, tubulin- $\beta$  (TUBB, TUBB4B),  
29 filamin-A (FLNA), plectin (PLEC), and laminin- $\beta$ 3 (LAMB3) were increased in D614 over  
30 G614 spike immunoprecipitations. The difference in binding can only be explained if  
31 host interactors bind to one or several cryptic motifs in S2 that are accessible only in the  
32 absence of S1 or alternatively in S with RBD in 'open' conformation (Figure 2C). RBD  
33 has previously been estimated to be in an 'open' conformation in an estimated 28% of  
34 spike proteins<sup>48</sup>. Here, we used Covalent Protein Painting (CPP)<sup>49</sup> on lysine residue  
35 P0DTC2#K97 in spike, and found that RBD is in an open confirmation in ~ 20 % of  
36 G614 spike. Because D614 spike sheds S1, the number of 'S2 only' proteoforms is  
37 increased by approximately 33% which in turn increases the accessibility of the cryptic  
38 motifs by ~ 1.8-fold. Thus, cellular proteins that are enriched in D614 spike  
39 immunoprecipitations may bind to S2 at cryptic binding motifs that are accessible in 'S2

## SARS-CoV-2 tropism

C. Bamberger *et al.*

1 only' proteoforms that have become available by the increased shedding of S1 and in  
2 'open', not 'closed', RBD conformations of S.

3 HSP7C, CALX, and UGGT1 all retain nascent proteins in the ER to ensure proper  
4 folding and refolding, or channel misfolded proteins to the ERAD. Spike D614 also  
5 bound more of the stress induced molecular chaperone GRP78/BiP. Western blots  
6 using a second set of biological replicate immunoprecipitations showed higher variability  
7 of GRP78/BiP in G614 than in D614 immunoprecipitations (Figure 3A). GRP78/BiP is  
8 exported with SARS-CoV-2 virions during virus egression<sup>9</sup> – potentially through the  
9 lysosomal pathway – and may facilitate SARS-CoV-2 cell infection as an alternative  
10 host factor that aids in virus cell entry<sup>50</sup>. Recent amino acid sequence homology  
11 comparisons suggest GRP78/BiP may bind to a region in RBD in S1<sup>51,52</sup> that  
12 encompasses the amino acid E484 in spike. Mutation (E484K) has been associated  
13 with SARS-CoV-2 mutant strains that can escape an initial humoral immune response  
14 to SARS-CoV-2<sup>53</sup>.

15 Further, we focused on the interaction of D614G spike with calnexin. Western blot  
16 analysis confirmed that less calnexin associated with G614 than D614 spike  
17 (Figure 3B), as observed with CoPIT (Figure 3C). We used immunostaining to  
18 determine the localization of spike with calnexin in 16HBEo<sup>-</sup> cells (Figure 3D). A  
19 quantitative analysis of the immunofluorescence images revealed that less calnexin  
20 localized with G614 spike than with D614 spike. Moreover, G614 but not D614 spike  
21 was visible in (calnexin-negative) cellular substructures which tended to be closer to the  
22 cell membrane. Thus, maturing G614 spike might escape the ER quality control better  
23 than D614 spike that includes high levels of spike 'S2 only' proteoforms.

### 24 ***Virus tropism based on the virus-host interactome***

25 Tropism, defined as the cell types and tissues that can be infected by a virus, is  
26 established by the host interactome of a virus, especially in the event of zoonosis. We  
27 wanted to know whether the protein interactions of spike – and more specifically of 'S2  
28 only' proteoforms in D614 spike – may lead to an ACE2 independent entry into cell  
29 types previously not associated with SARS-CoV-2 infection. To answer this question  
30 we devised a novel, proteome-based cell type set enrichment analysis (pCtSEA) to  
31 uncover SARS-CoV-2 virus tropism.

32 First, we sought to find out which lung cell types are most likely the target of SARS-  
33 CoV-2 based on the host proteins we identified with the 2xStrep tagged spike protein  
34 (Figure 4A). We used standard cell culture conditions to maintain proliferating cells;  
35 however, a subset constantly undergoes terminal differentiation, and ACE2 expression  
36 can be detected by RT-PCR<sup>54</sup>. We determined the Pearson's correlation of spike  
37 protein interactors with the digital gene expression (dge) in single cells isolated from  
38 human lung tissue<sup>55</sup>. The original analysis included a large number of non-annotated  
39 single cells (unknown) and seven distinct lung cell types (basal, ionocytes, brush,

## SARS-CoV-2 tropism

C. Bamberger *et al.*

1 secretory, FOXN4<sup>+</sup>, ciliated, and SLC16A7<sup>+</sup> cells) based on differences in dge. Single  
2 cells with a correlation of  $p > 0.4$  were sparsely scattered in non-annotated cells, basal  
3 and SLC16A7<sup>+</sup> cells in the original single cell plot of the dataset <sup>55</sup>. Overall, the dge in  
4 ciliated cells matched ( $p > 0.5$ ) more frequently with the host interactome than with any  
5 other cell type. This initial analysis indicated that ciliated epithelial cells in the lung are  
6 likely the cell type that is most susceptible to a productive SARS-CoV-2 infection in the  
7 lung.

8 Next, we improved pCtSEA so we could examine a larger panel of human single cells <sup>56</sup>  
9 using a sum of host proteins identified either with flag or 2xStrep tagged spike  
10 protein. The interactome matched 918 dge patterns out of 643,636 single cell  
11 measurements with a Pearson's correlation of  $p > 0.1$ . Sixty-seven of the 918 single  
12 cells were macrophages (hypergeometric test p-value  $< 9 \times 10^{-5}$ ). Macrophages were  
13 significantly enriched in a two-sample Kolmogorov-Smirnov goodness of fit test of all  
14 rank ordered single cells that passed an initial Pearson's correlation of  $p > 0.1$  (K-S p-  
15 value  $< 0.001$ , Figure 4B). Seventeen additional cell ontology terms were significantly  
16 enriched (K-S p-value  $< 0.001$ ) within all 117 cell ontology terms that were represented  
17 by the 918 single cells (Supplementary data 2). The remaining 99 cell types were  
18 depleted or represented by only few single cells.

19 The 18 cell types and cell ontology terms clustered in three different groups in a two-  
20 dimensional, uniform manifold approximation and projection map (UMAP) plot based on  
21 the single cell transcriptomes that overlapped with the host interactome of the spike  
22 protein (Figure 4C). Each group in the UMAP included one cell type that was  
23 significantly enriched when compared to a random distribution of p-values obtained by  
24 permutating the cell types in the dataset (normalized enrichment score). The significant  
25 cell ontology terms were (1) 'distal tubule' of the nephron or (2) 'macrophage' or (3)  
26 'mucous' tissue-associated cells. Two of these three groups comprised cell types of  
27 similar cell ontology. For example, the group with the cell type 'macrophage' also  
28 included 'dendritic cells' which are both mononuclear phagocytes of the immune  
29 system <sup>57</sup>. Cell types like 'distal tubule' and 'loop of Henle' of the nephron clustered  
30 together in the second group. Finally, monocytes and hepatocytes and cells of  
31 undefined cell ontology ('unknown') clustered with the cell ontology term  
32 'mucous'. Secretory cell types, which are characteristic of mucous tissues such as the  
33 sinus, bronchial, lung, and digestive tract epithelia, are ACE2/TMPRSS2 positive <sup>5</sup>. A  
34 subset of the cell types is ACE2/TMPRSS2 negative and therefore potentially prone to  
35 SARS-CoV-2 infection in the presence of 'S2 only' proteoforms. Thus, an in-depth  
36 analysis of the SARS-CoV-2 spike protein interactome with pCtSEA identified three  
37 different groups of cell types that are potentially prone to a productive SARS-CoV-2  
38 infection.



## SARS-CoV-2 tropism

C. Bamberger *et al.*

1 pCtSEA incorporates relative abundance of host interactors as a measure for cell type  
2 enrichment. We compared the relative expression levels of host interactors between  
3 the three groups (Figure 5). Laminin LAMB3 and LAMC2 were increased in the group  
4 labeled ‘mucous’ over ‘distal tubule’ and ‘macrophage’. A lack of filamin A (FLNA) and  
5 reduced relative levels of calnexin (CANX) but increased plectin (PLEC) characterized  
6 the group ‘distal tubule’. Thus, spike may preferentially disrupt hemi- and desmosomes  
7 formed by plectin in infected cells in the nephron. Likewise, spike might disrupt  
8 membrane anchoring of the actin cytoskeleton (FLNA) in infected cells within both  
9 groups cell types ‘macrophage’ and ‘mucous’.

## 10 Discussion

11 This study revealed a small number of host proteins that specifically interact with the  
12 SARS-CoV-2 spike protein. A subset of spike protein interactors points to an  
13 ACE2/TMPRSS2 independent cell entry which might explain an infection of  
14 ACE2/TMPRSS2 negative tissues with SARS-CoV-2. We found three major  
15 proteoforms encompassing full length, non-cleaved spike protein (S) or  
16 endoproteolytically cleaved spike protein (S1-S2/S2’) or ‘S2 only’ without S1. All  
17 proteoforms are expressed in 16HBEo<sup>-</sup> cells and presumably present on SARS-CoV-2  
18 virus particles following infection of ciliated epithelial cells. Because S1 harbors the  
19 RBD, ACE2 is the preferred entry receptor during initial virus infection. However, the N-  
20 terminal domain NTD in S1 of several different coronaviruses has been shown to bind to  
21 glycosaminoglycans<sup>58</sup> or sialoglycans on glycoproteins and gangliosides turning them  
22 into co-receptors or potential restriction factors<sup>59</sup>. We confirmed that D614 spike yields  
23 more ‘S2 only’ proteoforms, as observed previously. We speculate that the FBX2  
24 associated ubiquitination complex may preferentially recognize N-glycosylated, high-  
25 mannose S1 at N234<sup>14</sup> in D614 over G614 spike, which may target it more efficiently to  
26 ERAD. Further, we suspect that S2 in the absence of S1 may expose an otherwise  
27 cryptic receptor binding site which enables an alternative virus entry. Antibodies that  
28 bind to S2 with very high affinity and neutralize SARS-CoV-2 virus entry have been  
29 identified<sup>33</sup> and may confer protection against severe COVID-19<sup>60</sup>. Thus, we propose  
30 that loss of S1 alters the proteoform composition of spike in trimers, which in turn allows  
31 for infection of cells through an alternative, ACE2-independent virus entry. We  
32 speculate that extracellular laminins may serve as additional co-receptors to increase  
33 virus uptake.

34 This interpretation is supported by a pCtSEA analysis of the host interactome of  
35 spike. pCtSEA indicated that epithelial cells in the nephron and macrophages might get  
36 infected with SARS-CoV-2 in addition to lung epithelial cells. Notably, the immune cells  
37 identified with pCtSEA may be prone to antibody-dependent enhancement (ADE) of  
38 infection with  $\beta$ -coronaviruses<sup>61</sup> in the absence of ACE2. The cell types identified with  
39 pCtSEA reside in several different human tissues including muscle and brain

## SARS-CoV-2 tropism

C. Bamberger *et al.*

1 (oligodendrocytes and astrocytes). We speculate that an expanded tropism of SARS-  
2 CoV-2 might shed light on a prolonged progression of COVID-19 in select patients. A  
3 pCtSEA analysis can indicate whether a virus-host interactome in its native reservoir  
4 may permit a zoonosis, as observed in the COVID-19 pandemic. Indeed, when the  
5 virus did not co-evolve with the host, a high variability of host-virus protein-protein  
6 interactions may arise from introducing viral proteins into a novel, differently equilibrated  
7 host environment. Hence, it might explain the high variability in host interactors of  
8 SARS-CoV-2 that were identified in different cell lines and tissues<sup>25,28,62</sup>.

9 Our data analysis suggests that SARS-CoV-2 may utilize two alternate paths for cell  
10 entry: one path exploits ACE2 receptor binding, and the other path may be based on  
11 'S2 only' proteoforms that may bind to laminins as coreceptors. As a consequence, an  
12 adaptive immune response that targets almost exclusively antigenic S1 may fail to  
13 completely curb severe or persistent infections with SARS-CoV-2. Therefore, the host  
14 interactome of spike suggests that immunization strategies might provide increased  
15 protection against COVID-19 if the 'S2 only' proteoform is also used as immunogen.

SARS-CoV-2 tropism

C. Bamberger *et al.*

| Protein symbol | Ratio (G614/D614) | p-value | UniProt KB | Protein                                        |
|----------------|-------------------|---------|------------|------------------------------------------------|
| SRP72          | G614 only         | 0.00    | O76094     | Signal recognition particle subunit SRP72      |
| HMGB2          | G614 only         | 0.00    | P26583     | High mobility group protein B2                 |
| HMGB1          | 1.97              | 0.09    | P09429     | High mobility group protein B1                 |
| HMGN2          | 3.00              | 0.00    | P05204     | Non-histone chromosomal protein HMG-17         |
| TBB5           | 0.69              | 0.09    | P07437     | Tubulin beta chain                             |
| PLEC           | 0.68              | 0.08    | Q15149     | Plectin                                        |
| TBB4B          | 0.65              | 0.06    | P68371     | Tubulin beta-4B chain                          |
| ADT2           | 0.63              | 0.05    | P05141     | ADP/ATP translocase 2                          |
| FLNA           | 0.63              | 0.05    | P21333     | Filamin-A                                      |
| LAMB3          | 0.59              | 0.03    | Q13751     | Laminin subunit beta-3                         |
| BIP            | 0.56              | 0.02    | P11021     | Endoplasmic reticulum chaperone BiP            |
| HSP7C          | 0.55              | 0.02    | P11142     | Heat shock cognate 71 kDa protein              |
| CALX           | 0.50              | 0.01    | P27824     | Calnexin                                       |
| UGGG1          | 0.48              | 0.00    | Q9NYU2     | UDP-glucose:glycoprotein glucosyltransferase 1 |

1

2 **Table 1: Differential binding of host interactors with spike protein variants G614**  
3 **versus D614.** Rows highlighted in red are host interactors that are enriched in  
4 immunoprecipitations of G614 spike whereas host interactors that preferentially bind to  
5 D614 are highlighted in green. The columns indicate the protein symbol (UniProt), the  
6 ratio of differential presence and the p-value of detection as determined with  
7 CoPIT. The UniProt identifier and name of each protein are listed separately.

8

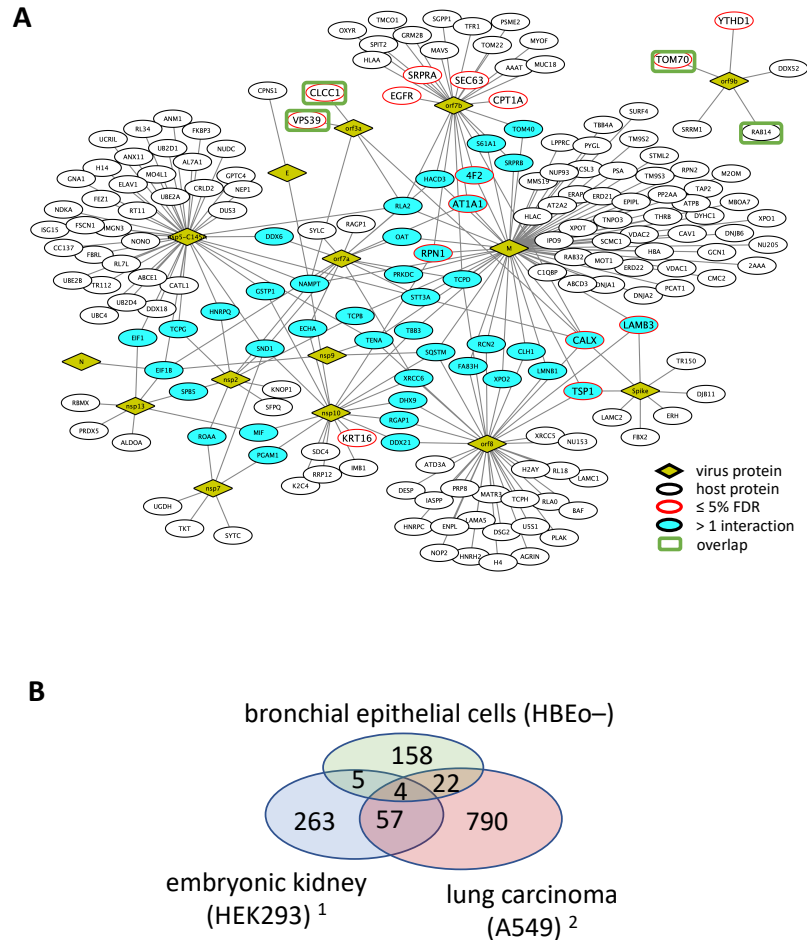

1

2 **Figure 1 Interactome of select SARS-CoV-2 ORFs with host proteins in 16HBEo<sup>-</sup>**  
 3 **cells. (A)** The edges in the protein-protein network indicate host proteins (ovals) that  
 4 were identified in immunoprecipitations of viral proteins (diamonds). Host interactors  
 5 that associated with more than one host protein or that are of high confidence  
 6 (BFDR  $\leq$  5%) are highlighted in turquoise and red, respectively. **(B)** The Venn diagram  
 7 shows the overlap of the host interactomes in HEK293<sup>25</sup>, A549<sup>28</sup> and 16HBEo<sup>-</sup> cells  
 8 (this study). The green rectangles in **(A)** indicate three of the four host interactors that  
 9 were identified in all three cell lines.

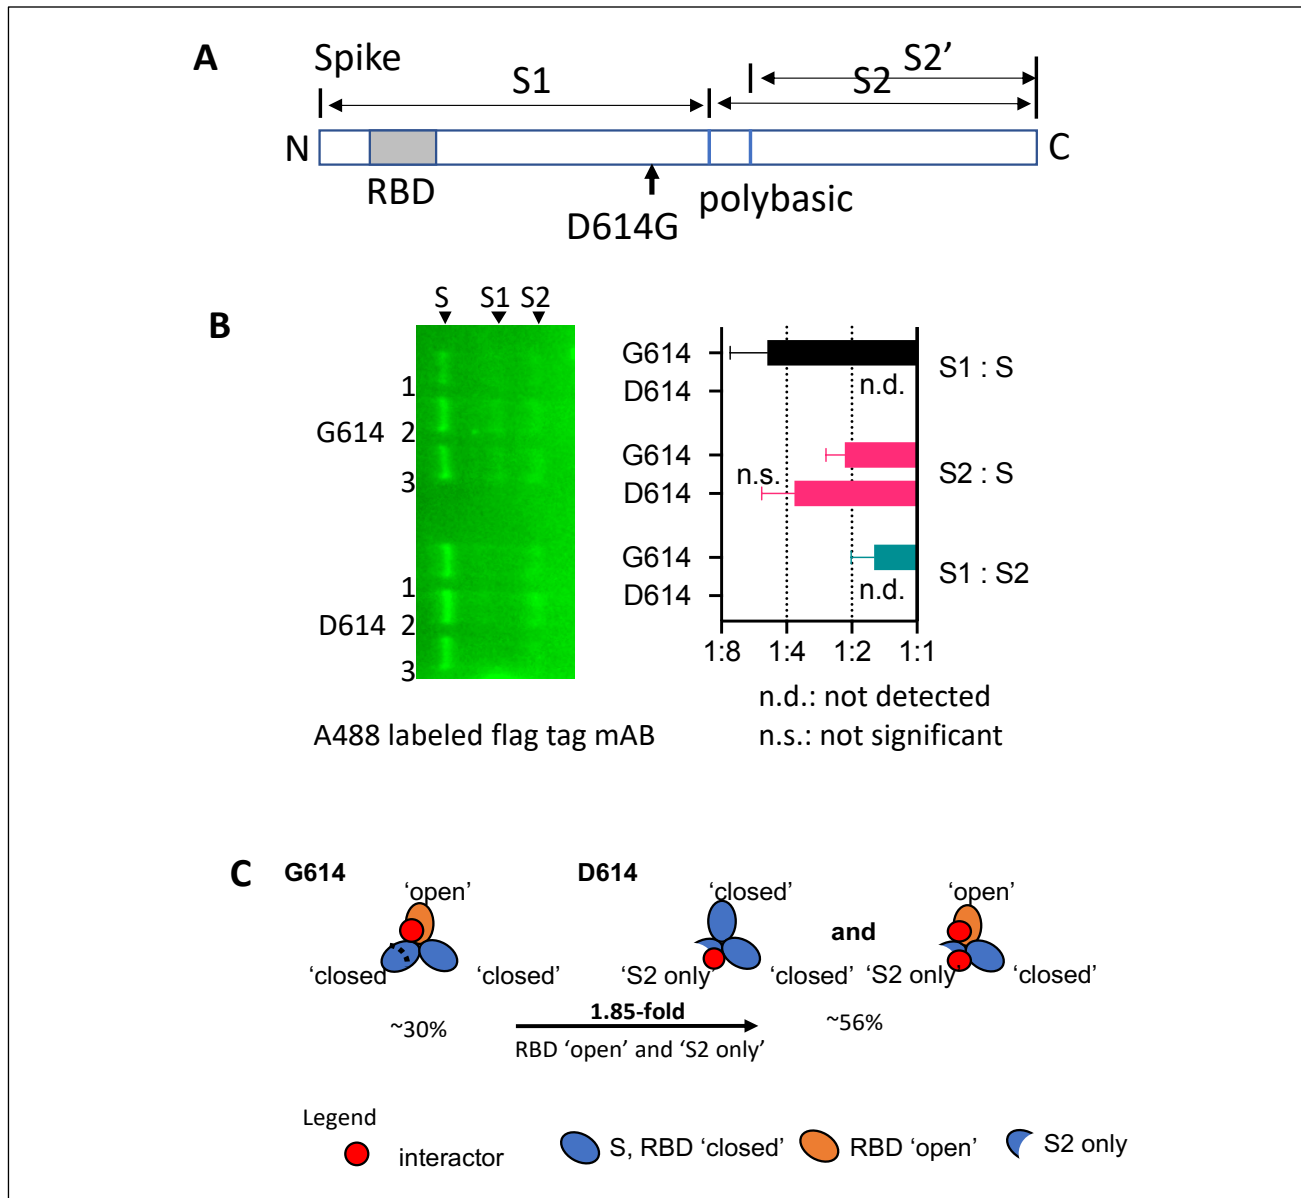

1

2 **Figure 2: (A)** Schematic of the spike protein and polybasic cleavage sites. Full-length  
 3 spike protein (S) can be cleaved into an N-terminal proteoform S1 and two different C-  
 4 terminal proteoforms S2 and S2' which are subsumed in 'S2 only'. **(B)**  
 5 Immunodetection of flag tagged spike proteoforms with Alexa 488 labeled flag tag  
 6 mAB. The bar graph indicates the relative abundance of full-length spike S and of the  
 7 endoproteolytic cleavage products, the spike proteoforms S1 and S2/S2'. Full-length  
 8 spike (S) harbors one anti-flag tag antibody binding site at the N- and C-terminus. **(C)**  
 9 The schematic indicates the presence of host interactor binding sites on S that overlap  
 10 between 'S2 only' and the RBD 'open' conformation in S. Percentages indicate the  
 11 increase (~2 fold) in 'S2 only' binding site availability in D614 over G614 spike.



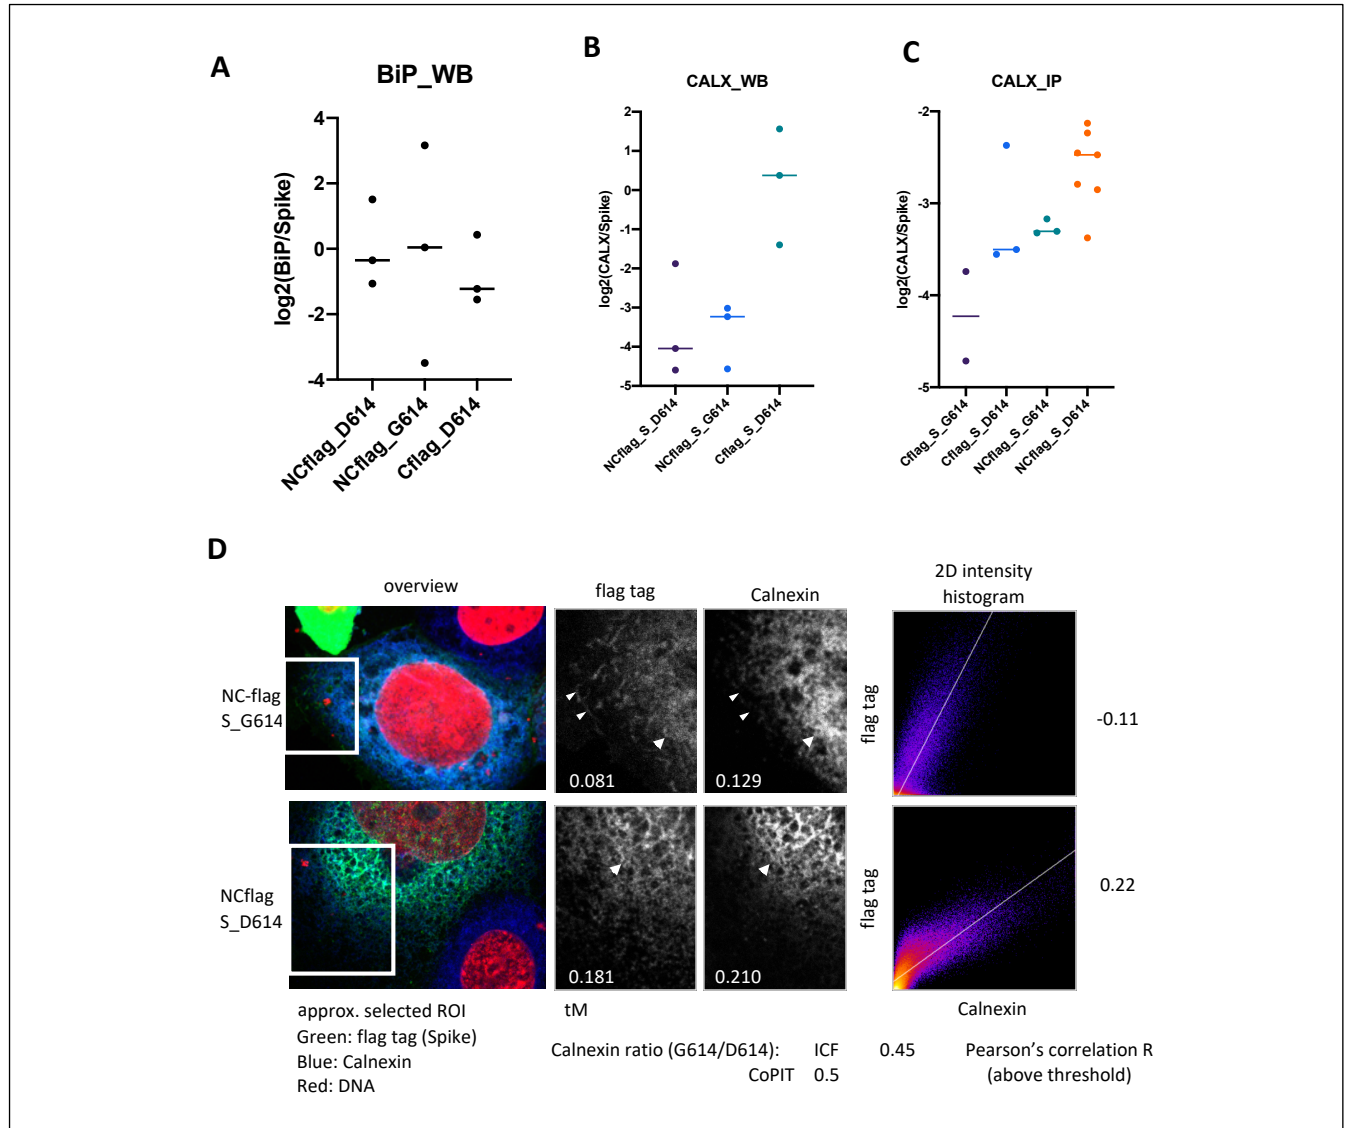

1 **Figure 3: Interaction of spike with BiP and Calnexin.** (A) The plot shows the  
 2 relative abundance of GRP78/BiP to spike in three independent immunoprecipitations of  
 3 spike. (B) Calnexin was detected and quantified in spike G614D immunoprecipitations  
 4 in different biological replicate experiments by Western blot (B) or mass spectrometry  
 5 (C). Calnexin was detected by chemiluminescence (horseradish peroxidase coupled  
 6 secondary antibody). Horizontal bar: Median. (D) Confocal images were analyzed for  
 7 colocalization of spike with calnexin in immunofluorescence stained 16HBEo- cells  
 8 in the regions of interest depicted in the overview. Arrows indicate colocalization of spike  
 9 with calnexin whereas arrowheads point out spike protein that did not colocalize with  
 10 calnexin. The colocalization of spike and calnexin above threshold was quantified with  
 11 Mander's overlap coefficient (tM) and Pearson's correlation.

12

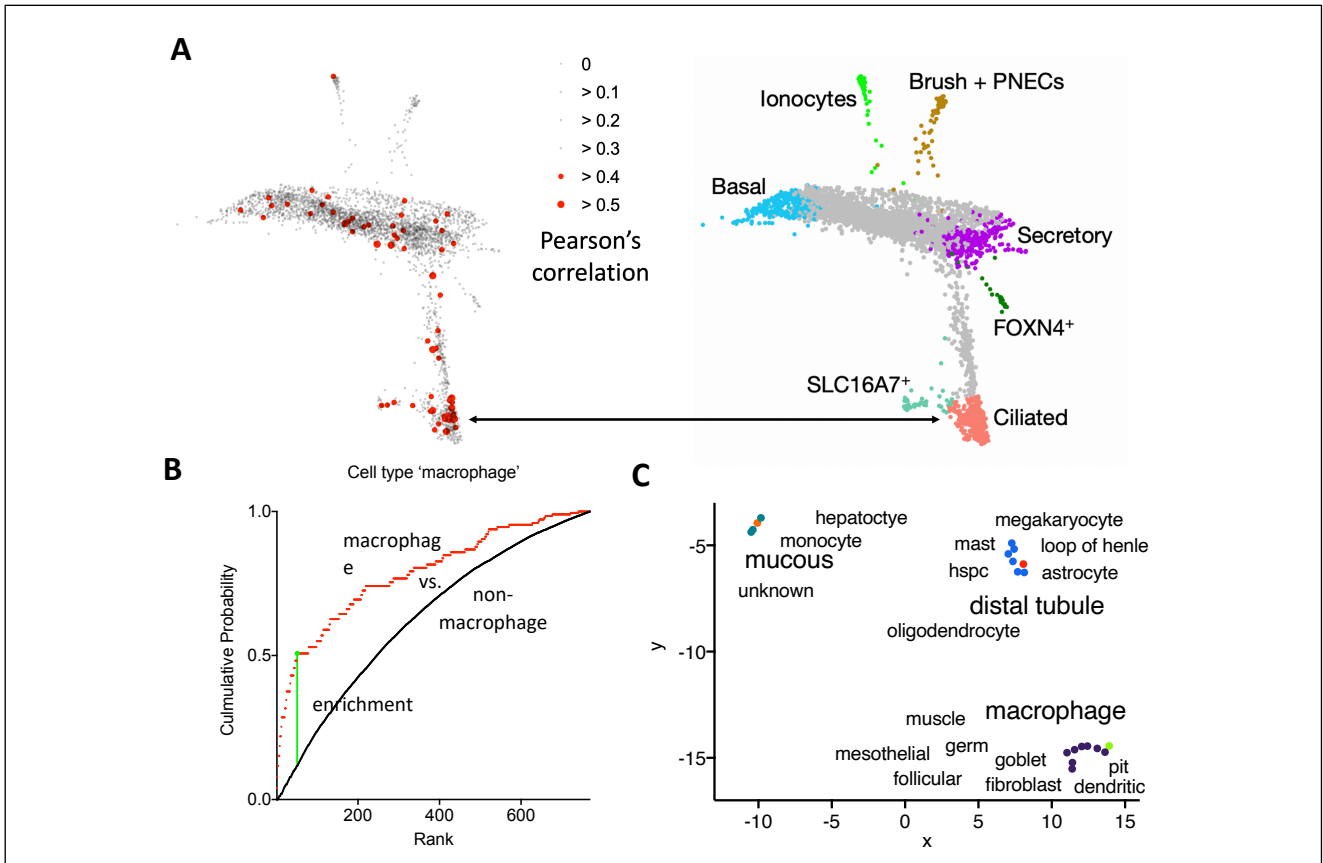

1

2 **Figure 4: pCtSEA analysis of the SARS-CoV-2 tropism based on the spike protein**  
 3 **interactome. (A)** The scatter plot highlights the limited overlap of the host interactome  
 4 with single cell transcriptomes of different lung cell types (adopted from <sup>55</sup>). The host  
 5 interactome of spike was correlated with the digital gene expression levels of single lung  
 6 cell transcriptomes taking the presence and relative abundance of interactors into  
 7 account. **(B)** The plot of the cumulative probability shows the weighted empirical  
 8 distribution of macrophage cells in which the transcriptome correlated with the spike  
 9 host cell interactome (red line), whereas the black line is the empirical distribution of all  
 10 'non-macrophage' cell types with  $p > 0.1$ . The green vertical line indicates the  
 11 suprema. **(C)** Additional cell types that may be prone to SARS-CoV-2 infection are  
 12 plotted in a uniform manifold approximation and projection (UMAP) which shows three  
 13 clusters based on a differential presence of host interactors in the single cell  
 14 transcriptomes.

15

1

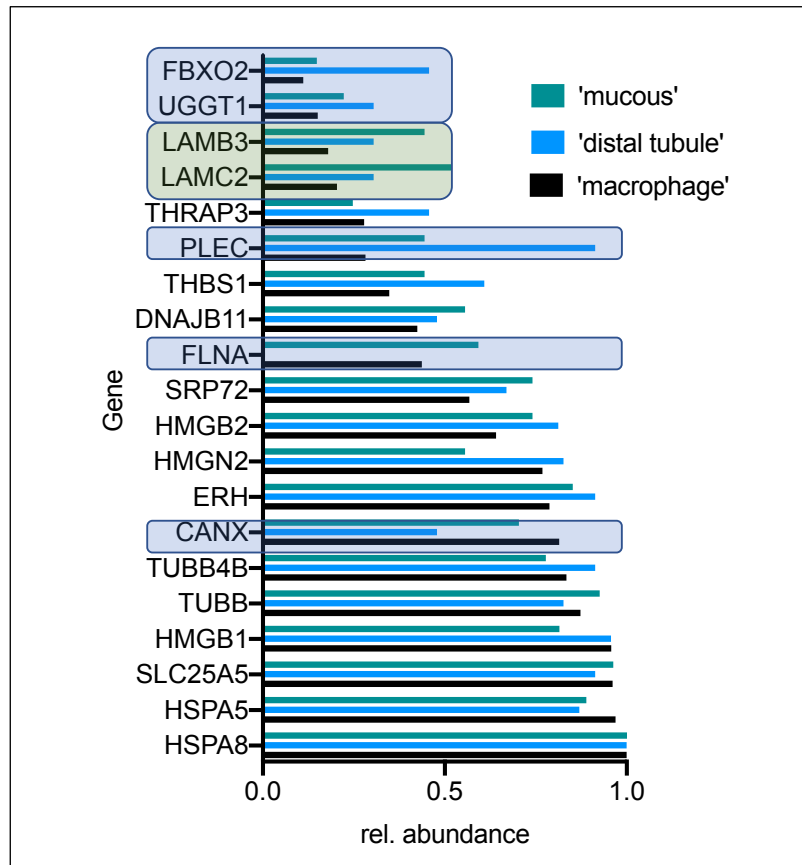

2 **Figure 5:** The bar graph indicates the relative abundance of gene transcripts in the  
3 three groups labeled 'mucous', 'distal tubule' and 'macrophage' that were identified  
4 initially with pCtSEA. Genes that deviate in expression levels relative to the group  
5 'macrophages' are boxed in light blue or green for the groups 'distal tubule' or 'mucous',  
6 respectively.

7

1 **Methods**

2 **Expression plasmids**

3 All SARS-CoV-2 ORF expression plasmids were obtained from the laboratory of Nevan  
4 Krogan<sup>63</sup>. Viral ORFs were provided as inserts into the vector backbone pLVX-  
5 EF1alpha-2xStrep-IRES-Puro except for the spike protein cDNA which was cloned into  
6 pTwist vector and extended at the C-terminus with a 2xStrep tag. Expression vectors  
7 for the N-terminal or N- and C-terminal flag tagged spike protein variants D614 and  
8 G614 were kindly provided by Hyeryun Choe's laboratory<sup>25,64</sup>.

9 **Cell culture, transfection and transduction**

10 HEK293T cells were grown at 37 °C and 5 % CO<sub>2</sub> in DMEM supplemented with 10%  
11 tetracycline-free fetal bovine serum and 1% Penicillin-Streptomycin (Invitrogen). Cells  
12 were transfected with the LentiX VSV-G transfection mix (Clontech) and different SARS-  
13 CoV-2 ORFs (cloned into pLX vector). VSV-G pseudo-typed lentiviral particles were  
14 collected 48 h later and filtered through a 0.22 µm filter. Human bronchial epithelial  
15 cells (16HBEo-) were transduced with VSV-G pseudo-typed lentiviral particles in the  
16 presence of 3 µg/ml polybrene (Millipore). Expression vectors encoding the spike  
17 protein cDNA were directly transfected into 16HBEo- with Lipofectamine P3000  
18 according to manufacturer's recommendations (Invitrogen). Transduced and  
19 transfected 16HBEo- cells were grown at 37 °C and 5 % CO<sub>2</sub> for additional 48 h prior to  
20 harvest.

21 **Immunoprecipitation**

22 Cells were lysed in TNI lysis buffer (50 mM Tris pH 7.5, 250 mM NaCl, 1 mM EDTA,  
23 0.5 % Igepal CA-630, 1 x Complete ULTRA EDTA-free protease inhibitor mix (Roche),  
24 1 x HALT Phosphatase inhibitor mix (Thermo) for 20 min at 4 °C and further processed  
25 for immunoprecipitation according to<sup>46</sup>. 2xStrep tagged SARS-CoV-2 ORFs were  
26 immunoprecipitated using 30 µl of Megastrep type 3 XT beads (IBA LifeSciences,  
27 Germany), and flag-tagged SARS-CoV-2 ORFs were immunoprecipitated using Anti-  
28 DYKDDDDK Magnetic Agarose (Pierce) at 4 °C for 16 h. Beads were washed 3 x with  
29 10 volumes of TNI buffer (50 mM Tris pH 7.5, 250 mM NaCl, 0.5 % Igepal CA-630) and

## SARS-CoV-2 tropism

C. Bamberger *et al.*

1 2 x with 10 volumes of TN buffer (50 mM Tris pH 7.5, 250 mM NaCl, 1 mM EDTA)  
2 before elution with 8 M urea, 5 mM TCEP, 0.1 % (w:v) Rapigest (Waters) for 15 min at  
3 60 °C.

### 4 **Digestion, sample purification and mass spectrometry**

5 Eluted proteins were alkylated with chloroacetamide (10 mM, 30 min, 37 °C) and  
6 digested at 37 °C for 16 h in 100 mM Tris HCl, pH 7.2, in the presence of 0.5 to 0.8 M  
7 urea with the endoprotease Trypsin (Promega). Peptides were subsequently bound to  
8 the reversed phase in Evotips (Evosep) and washed according to manufacturer's  
9 recommendations. Each immunoprecipitation was measured in technical  
10 duplicate. Following elution and chromatographic separation of peptides on a 15 cm  
11 ReproSil C18 column (3 µm, 120 Å, id 100 µm, PepSep) with a 45 min gradient  
12 (Evosep), peptides were detected and fragmented with a timsTOFpro mass  
13 spectrometer (Bruker) with PASEF enabled <sup>65</sup>.

### 14 **Data analysis**

15 Fragment ion mass spectra were extracted from timsTOFpro raw data files and stored  
16 in the ms2.txt flat-file format. Fragment ion spectra were searched with Prolucid <sup>66</sup> with  
17 the forward and reversed human UniProt database v.07-01-2020, and filtered with  
18 DTASelect <sup>67</sup> to a false discovery rate of < 1 %. Immunoprecipitation experiments were  
19 filtered with SAINTexpress to remove non-specific background proteins <sup>68</sup>  
20 (Supplementary Table 1). The final virus-host protein-protein interactome includes all  
21 2xStrep tagged virus-host protein interactions. Due to a different background of  
22 contaminants of flag versus 2xStrep tag, flag-tag immunoprecipitations were not further  
23 considered for the spike protein in the final network of virus-host interactions  
24 immunoprecipitations (Figure 1A). Spike protein immunoprecipitations of the variants  
25 D164 and G614 were directly compared with CoPIT <sup>26</sup>. Interactors present in ≥ 2  
26 biological replicates and detected as differentially expressed with a cut off value of 0.1  
27 (CoPITgenerator) were further analyzed. Keratins are often observed as contaminants  
28 in immunoprecipitation experiments from epithelial cell lines and therefore were  
29 excluded from further analysis.

### 30 **Immunofluorescence detection and protein co-localization**



## SARS-CoV-2 tropism

C. Bamberger *et al.*

1 48 hours post transfection cells were washed with 1x PBS, fixed in 4%  
2 paraformaldehyde/1x PBS for 15 min at RT, permeabilized with 0.1 % Triton X-  
3 100/1xPBS for 10 min at RT, washed three times with 1x PBS and incubated with 5 %  
4 horse serum/1xPBS for 1 h at 20 °C before incubating with the following antibodies (Cell  
5 Signaling Laboratories): anti-calnexin (clone C5C9), anti-BiP (clone C50B12), anti-  
6 Hsp90a (clone D1A7), anti-ZO1 (clone D7D12), anti-ZO2 (2847), anti-ZO3 (D57G7),  
7 anti-claudin 1 (D5H1D), anti-CD2AP (2135), anti-afadin (clone D1Y3Z) or Alexa  
8 Fluor 488 anti-DYKDDDDK (flag) tag monoclonal antibody (L5, Life Technologies). The  
9 plasma membrane was stained with CF594 dye conjugated wheat germ agglutinin  
10 (Biotium), while ER was stained with the ER Cytopainter staining kit (AbCam) according  
11 to manufacturer recommendations. Images were taken with a Zeiss LSM 780 confocal  
12 laser scanning microscope and analyzed using Fiji/ImageJ (v.2.1.0/1.53c).

## 13 **Western blotting**

14 One volume of 2x SDS sample loading buffer was added to samples in TN buffer  
15 (1:1; v:v) and samples were heated to 50°C for 15 min. Proteins were separated on  
16 NuPAGE 4-12% Bis-Tris gels (Life technologies) before transferring proteins onto  
17 Nitrocellulose membranes and incubating with anti-BiP (C50B12, Cell Signaling  
18 Laboratories (CSL)), anti-ZO1 (D7D12, CSL), anti-ZO2 (2847, CSL) or Alexa Fluor 488  
19 conjugated anti-DYKDDDDK Tag monoclonal antibody (L5, Sigma) in 5 % BSA,  
20 1x PBS, 0.05 % Tween-20. Signals were detected either using Radiance Q ECL  
21 reagent (Azure Biosystems) after washing and incubation with HRP coupled anti-rabbit  
22 antibodies (CSL) or imaged directly using an Azure 600 Western blot imaging  
23 system. Western blot images were quantified in Fiji/ImageJ.

## 24 **Proteome based Cell Type Set Enrichment Analysis (pCtSEA)**

25 The input dataset for a pCtSEA analysis can be the host interactome of SARS-CoV-2 or  
26 any proteome that is listed with a UniProt identifier and an abundance value (Spectral  
27 counts, SpC). Importantly, pCtSEA assumes that at least a partial stoichiometric  
28 relationship exists between the relative abundance of mRNA transcripts in cells the  
29 proteins in the interactome. First, single cell transcriptomes are filtered for the  
30 expression of  $\geq 10$  genes that are also present in the proteome. All protein abundances

## SARS-CoV-2 tropism

C. Bamberger *et al.*

1 are correlated with the single cell digital gene expression (dge) values (Pearson's  
2 correlation), and each cell type or cell ontology term with  $\geq 10$  cells that pass the  
3 Pearson's correlation threshold of  $p > 0.1$  is further evaluated. pCtSEA calculates the p-  
4 value of the hypergeometric test and an enrichment score based on a two-sample  
5 Kolmogorov-Smirnov goodness of fit test (K-S test) in which the empirical cumulative  
6 distribution function of cells specific for a cell type is compared to the remaining cells  
7 when rank ordered by their correlation values. In addition, the value and rank position  
8 of the supremum is reported. Furthermore, each cell type enrichment score is  
9 differentiated from a population of enrichment scores (suprema) that is obtained in an  
10 iterative process in which cell type labels are randomly permuted, yielding an  
11 empirical p-value that indicates the significance of enrichment. Finally, the total  
12 distribution of all enrichment scores of all cell types is corrected for multiple hypothesis  
13 testing and a false discovery rate (FDR) associated with each cell type.

14 Cell types that are significantly enriched (K-S test) are clustered based on the relative  
15 overlap of the proteins that correlated with the single cell gene expression pattern using  
16 a uniform manifold approximation and projection (UMAP). pCtSEA is accessible as web  
17 tool: <http://pctsea.scripps.edu>.

18

## 19 **Acknowledgements**

20 We are indebted to Hyeryun Choe and April Tobey for the HA-tagged spike protein  
21 D614G. The thank Claire Delahunty for critically reading the manuscript.

22

## 23 **Author Contributions**

24 C.B. and S.P. designed and executed the experiments. J.D. analyzed the samples on  
25 the mass spectrometer, R.P. performed data analysis of mass spectrometric data. C.B.  
26 conceived pCtSEA and S.M.-B. realized pCtSEA. J.R.Y. provided funding and  
27 instrumentation. C.B. performed data analysis, prepared figures and wrote the  
28 manuscript.

## 29 **Competing financial interest**

SARS-CoV-2 tropism

C. Bamberger *et al.*

1 The authors declare no competing financial interests.

## 2 **Funding**

3 Funding was provided by NIH grants R33CA212973 (IMAT) and P41GM103533  
4 awarded to John R. Yates III.

5

6 **Extended data network 1: The virus-host protein network of select SARS-CoV-2**  
7 **open reading frames in 16HBEo-cells is depicted.** The bipartite network is available

8 at the url: <http://ndexbio.org/#/network/cb71d1f8-12fa-11eb-9eee->

9 [0ac135e8bacf?accesskey=1713beeb8f740c163894126d8346ea4c20edbf1e4910f4da41](http://ndexbio.org/#/network/cb71d1f8-12fa-11eb-9eee-0ac135e8bacf?accesskey=1713beeb8f740c163894126d8346ea4c20edbf1e4910f4da41c6bdd153f673b5)  
10 [c6bdd153f673b5](http://ndexbio.org/#/network/cb71d1f8-12fa-11eb-9eee-0ac135e8bacf?accesskey=1713beeb8f740c163894126d8346ea4c20edbf1e4910f4da41c6bdd153f673b5)

11 **Supplementary data 1:** The table lists all proteins detected in the IP-MS experiments  
12 and their respective scores upon analysis with SAINTexpress for the probability of a  
13 virus-protein interaction.

14 **Supplementary data 2:** pCtSEA analysis of the host interactome of spike in 16HBEo-  
15 cells.

16 **Data availability:** Mass spectrometric fragmentation ion spectra and quantification files  
17 can be accessed in Massive (MSV000086433) or ProteomeExchange  
18 (PXD022457). Access will be made available upon request by reviewers.

19

20

21

1 **Literature**

- 2 1 Andersen, K. G., Rambaut, A., Lipkin, W. I., Holmes, E. C. & Garry, R. F. The proximal  
3 origin of SARS-CoV-2. *Nat Med* **26**, 450-452, (2020).
- 4 2 Letko, M., Marzi, A. & Munster, V. Functional assessment of cell entry and receptor  
5 usage for SARS-CoV-2 and other lineage B betacoronaviruses. *Nat Microbiol* **5**, 562-569,  
6 (2020).
- 7 3 Yan, R. *et al.* Structural basis for the recognition of SARS-CoV-2 by full-length human  
8 ACE2. *Science* **367**, 1444-1448, (2020).
- 9 4 Hoffmann, M. *et al.* SARS-CoV-2 Cell Entry Depends on ACE2 and TMPRSS2 and Is  
10 Blocked by a Clinically Proven Protease Inhibitor. *Cell* **181**, 271-280 e278, (2020).
- 11 5 Sungnak, W. *et al.* SARS-CoV-2 entry factors are highly expressed in nasal epithelial cells  
12 together with innate immune genes. *Nat Med* **26**, 681-687, (2020).
- 13 6 Gaebler, C. *et al.* Evolution of antibody immunity to SARS-CoV-2. *Nature*, (2021).
- 14 7 Harcourt, J. *et al.* Severe Acute Respiratory Syndrome Coronavirus 2 from Patient with  
15 Coronavirus Disease, United States. *Emerg Infect Dis* **26**, 1266-1273, (2020).
- 16 8 Ou, X. *et al.* Characterization of spike glycoprotein of SARS-CoV-2 on virus entry and its  
17 immune cross-reactivity with SARS-CoV. *Nature Communications* **11**, 1620, (2020).
- 18 9 Ghosh, S. *et al.*  $\beta$ -Coronaviruses use lysosomal organelles for cellular egress. *bioRxiv*,  
19 2020.2007.2025.192310, (2020).
- 20 10 Srinivasan, S. *et al.* Structural Genomics of SARS-CoV-2 Indicates Evolutionary Conserved  
21 Functional Regions of Viral Proteins. *Viruses* **12**, (2020).
- 22 11 Jiang, H.-w. *et al.* SARS-CoV-2 Orf9b suppresses type I interferon responses by targeting  
23 TOM70. *Cellular & Molecular Immunology* **17**, 998-1000, (2020).
- 24 12 Schubert, K. *et al.* SARS-CoV-2 Nsp1 binds the ribosomal mRNA channel to inhibit  
25 translation. *Nature structural & molecular biology*, (2020).
- 26 13 Watanabe, Y., Allen, J. D., Wrapp, D., McLellan, J. S. & Crispin, M. Site-specific glycan  
27 analysis of the SARS-CoV-2 spike. *Science* **369**, 330-333, (2020).
- 28 14 Bangaru, S. *et al.* Structural analysis of full-length SARS-CoV-2 spike protein from an  
29 advanced vaccine candidate. *Science* **370**, 1089-1094, (2020).
- 30 15 Coutard, B. *et al.* The spike glycoprotein of the new coronavirus 2019-nCoV contains a  
31 furin-like cleavage site absent in CoV of the same clade. *Antiviral Res* **176**, 104742-  
32 104742, (2020).
- 33 16 Xiong, X. *et al.* A thermostable, closed SARS-CoV-2 spike protein trimer. *Nature*  
34 *structural & molecular biology* **27**, 934-941, (2020).
- 35 17 Barile, E. *et al.* Potential Therapeutic Targeting of Coronavirus Spike Glycoprotein  
36 Priming. *Molecules* **25**, 2424, (2020).
- 37 18 Bruscia, E. *et al.* Isolation of CF cell lines corrected at  $\Delta F508$ -CFTR locus by SFHR-  
38 mediated targeting. *Gene Therapy* **9**, 683-685, (2002).
- 39 19 Subramanian, A. *et al.* Gene set enrichment analysis: a knowledge-based approach for  
40 interpreting genome-wide expression profiles. *Proceedings of the National Academy of*  
41 *Sciences of the United States of America* **102**, 15545-15550, (2005).
- 42 20 Mootha, V. K. *et al.* PGC-1 $\alpha$ -responsive genes involved in oxidative phosphorylation  
43 are coordinately downregulated in human diabetes. *Nat Genet* **34**, 267-273, (2003).

## SARS-CoV-2 tropism

C. Bamberger *et al.*

- 1 21 Moler, E. J., Radisky, D. C. & Mian, I. S. Integrating naive Bayes models and external  
2 knowledge to examine copper and iron homeostasis in *S. cerevisiae*. *Physiol Genomics* **4**,  
3 127-135, (2000).
- 4 22 Zhang, L. *et al.* SARS-CoV-2 spike-protein D614G mutation increases virion spike density  
5 and infectivity. *Nat Commun* **11**, 6013, (2020).
- 6 23 Korber, B. *et al.* Tracking Changes in SARS-CoV-2 Spike: Evidence that D614G Increases  
7 Infectivity of the COVID-19 Virus. *Cell* **182**, 812-827 e819, (2020).
- 8 24 Alexander-Brett, J. & Holtzman, M. J. in *Mucosal Immunology (Fourth Edition)* (eds Jiri  
9 Mestecky *et al.*) 1013-1021 (Academic Press, 2015).
- 10 25 Gordon, D. E. *et al.* A SARS-CoV-2 protein interaction map reveals targets for drug  
11 repurposing. *Nature* **583**, 459-468, (2020).
- 12 26 Pankow, S., Bamberger, C., Calzolari, D., Bamberger, A. & Yates, J. R. Characterization of  
13 membrane protein interactomes by Co-interacting Protein Identification Technology  
14 (CoPIT). (2015).
- 15 27 Teo, G. *et al.* SAINTexpress: Improvements and additional features in Significance  
16 Analysis of INTeractome software. *Journal of Proteomics* **100**, 37-43, (2014).
- 17 28 Stukalov, A. *et al.* Multi-level proteomics reveals host-perturbation strategies of SARS-  
18 CoV-2 and SARS-CoV. *bioRxiv*, 2020.2006.2017.156455, (2020).
- 19 29 Chu, Q. *et al.* Regulation of the ER stress response by a mitochondrial microprotein.  
20 *Nature Communications* **10**, 4883, (2019).
- 21 30 Magro, C. *et al.* Complement associated microvascular injury and thrombosis in the  
22 pathogenesis of severe COVID-19 infection: A report of five cases. *Transl Res* **220**, 1-13,  
23 (2020).
- 24 31 Kivirikko, S., McGrath, J. A., Pulkkinen, L., Uitto, J. & Christiano, A. M. Mutational  
25 Hotspots in the LAMB3 Gene in the Lethal (Herlitz) Type of Junctional Epidermolysis  
26 Bullosa. *Human Molecular Genetics* **5**, 231-237, (1996).
- 27 32 Mavilio, F. *et al.* Correction of junctional epidermolysis bullosa by transplantation of  
28 genetically modified epidermal stem cells. *Nature Medicine* **12**, 1397-1402, (2006).
- 29 33 Jarad, G., Cunningham, J., Shaw, A. S. & Miner, J. H. Proteinuria precedes podocyte  
30 abnormalities in *Lamb2*<sup>-/-</sup> mice, implicating the glomerular basement membrane as an  
31 albumin barrier. *The Journal of Clinical Investigation* **116**, 2272-2279, (2006).
- 32 34 Noakes, P. G. *et al.* The renal glomerulus of mice lacking  $\alpha$ -laminin/laminin  $\beta$ 2: nephrosis  
33 despite molecular compensation by laminin  $\beta$ 1. *Nature Genetics* **10**, 400-406, (1995).
- 34 35 Chiu, W.-L., Lin, C.-L., Yang, M.-H., Tzou, D.-L. M. & Chang, W. Vaccinia Virus 4c (A26L)  
35 Protein on Intracellular Mature Virus Binds to the Extracellular Cellular Matrix Laminin.  
36 *Journal of Virology* **81**, 2149-2157, (2007).
- 37 36 Steukers, L., Glorieux, S., Vandekerckhove, A. P., Favoreel, H. W. & Nauwynck, H. J.  
38 Diverse microbial interactions with the basement membrane barrier. *Trends in*  
39 *Microbiology* **20**, 147-155, (2012).
- 40 37 Nath, P. R. *et al.* CD47 Expression in Natural Killer Cells Regulates Homeostasis and  
41 Modulates Immune Response to Lymphocytic Choriomeningitis Virus. *Frontiers in*  
42 *Immunology* **9**, (2018).



## SARS-CoV-2 tropism

C. Bamberger *et al.*

- 1 38 Kim, D. J., Christofidou, E. D., Keene, D. R., Milde, M. H. & Adams, J. C. Intermolecular  
2 interactions of thrombospondins drive their accumulation in extracellular matrix.  
3 *Molecular biology of the cell* **26**, 2640-2654, (2015).
- 4 39 Crombie, R. *et al.* Identification of a CD36-related thrombospondin 1-binding domain in  
5 HIV-1 envelope glycoprotein gp120: relationship to HIV-1-specific inhibitory factors in  
6 human saliva. *J Exp Med* **187**, 25-35, (1998).
- 7 40 Lynch, J. M. *et al.* A thrombospondin-dependent pathway for a protective ER stress  
8 response. *Cell* **149**, 1257-1268, (2012).
- 9 41 Chu, H. *et al.* Middle East respiratory syndrome coronavirus and bat coronavirus HKU9  
10 both can utilize GRP78 for attachment onto host cells. *The Journal of biological*  
11 *chemistry* **293**, 11709-11726, (2018).
- 12 42 Tsai, B., Ye, Y. & Rapoport, T. A. Retro-translocation of proteins from the endoplasmic  
13 reticulum into the cytosol. *Nature Reviews Molecular Cell Biology* **3**, 246-255, (2002).
- 14 43 Fukushi, M. *et al.* Monitoring of S protein maturation in the endoplasmic reticulum by  
15 calnexin is important for the infectivity of severe acute respiratory syndrome  
16 coronavirus. *Journal of virology* **86**, 11745-11753, (2012).
- 17 44 Yoshida, Y. *et al.* E3 ubiquitin ligase that recognizes sugar chains. *Nature* **418**, 438-442,  
18 (2002).
- 19 45 Zhang, H.-J. *et al.* Epstein-Barr virus activates F-box protein FBXO2 to limit viral  
20 infectivity by targeting glycoprotein B for degradation. *PLoS pathogens* **14**, e1007208,  
21 (2018).
- 22 46 Pankow, S., Bamberger, C., Calzolari, D., Bamberger, A. & Yates, J. R., 3rd. Deep  
23 interactome profiling of membrane proteins by co-interacting protein identification  
24 technology. *Nature protocols* **11**, 2515-2528, (2016).
- 25 47 Jung, J. H. *et al.* Hepatitis C virus infection is blocked by HMGB1 released from virus-  
26 infected cells. *J Virol* **85**, 9359-9368, (2011).
- 27 48 Ke, Z. *et al.* Structures and distributions of SARS-CoV-2 spike proteins on intact virions.  
28 *Nature* **588**, 498-502, (2020).
- 29 49 Bamberger, C. *et al.* Covalent Protein Painting Reveals Structural Changes in the  
30 Proteome in Alzheimer Disease. *bioRxiv*, 2020.2001.2031.929117, (2020).
- 31 50 Ha, D. P., Van Krieken, R., Carlos, A. J. & Lee, A. S. The stress-inducible molecular  
32 chaperone GRP78 as potential therapeutic target for coronavirus infection. *Journal of*  
33 *Infection* **81**, 452-482, (2020).
- 34 51 Elfiky, A. A. SARS-CoV-2 Spike-Heat Shock Protein A5 (GRP78) Recognition may be  
35 Related to the Immersed Human Coronaviruses. *Frontiers in Pharmacology* **11**, (2020).
- 36 52 Ibrahim, I. M., Abdelmalek, D. H., Elshahat, M. E. & Elfiky, A. A. COVID-19 spike-host cell  
37 receptor GRP78 binding site prediction. *J Infect* **80**, 554-562, (2020).
- 38 53 Greaney, A. J. *et al.* Comprehensive mapping of mutations to the SARS-CoV-2 receptor-  
39 binding domain that affect recognition by polyclonal human serum antibodies. *bioRxiv*,  
40 2020.2012.2031.425021, (2021).
- 41 54 Kam, Y.-W. *et al.* Cleavage of the SARS coronavirus spike glycoprotein by airway  
42 proteases enhances virus entry into human bronchial epithelial cells in vitro. *PLoS one* **4**,  
43 e7870-e7870, (2009).

## SARS-CoV-2 tropism

C. Bamberger *et al.*

- 1 55 Plasschaert, L. W. *et al.* A single-cell atlas of the airway epithelium reveals the CFTR-rich  
2 pulmonary ionocyte. *Nature* **560**, 377-381, (2018).
- 3 56 Han, X. *et al.* Construction of a human cell landscape at single-cell level. *Nature* **581**,  
4 303-309, (2020).
- 5 57 Guilliams, M. *et al.* Dendritic cells, monocytes and macrophages: a unified nomenclature  
6 based on ontogeny. *Nature Reviews Immunology* **14**, 571-578, (2014).
- 7 58 Mycroft-West, C. J. *et al.* Heparin inhibits cellular invasion by SARS-CoV-2: structural  
8 dependence of the interaction of the surface protein (spike) S1 receptor binding domain  
9 with heparin. *bioRxiv*, 2020.2004.2028.066761, (2020).
- 10 59 Tortorici, M. A. *et al.* Structural basis for human coronavirus attachment to sialic acid  
11 receptors. *Nature structural & molecular biology* **26**, 481-489, (2019).
- 12 60 Braun, J. *et al.* SARS-CoV-2-reactive T cells in healthy donors and patients with COVID-  
13 19. *Nature* **587**, 270-274, (2020).
- 14 61 Eroshenko, N. *et al.* Implications of antibody-dependent enhancement of infection for  
15 SARS-CoV-2 countermeasures. *Nature biotechnology* **38**, 789-791, (2020).
- 16 62 Samavarchi-Tehrani, P. *et al.* A SARS-CoV-2 – host proximity interactome. *bioRxiv*,  
17 2020.2009.2003.282103, (2020).
- 18 63 Bouhaddou, M. *et al.* The Global Phosphorylation Landscape of SARS-CoV-2 Infection.  
19 *Cell* **182**, 685-712 e619, (2020).
- 20 64 Zhang, L. *et al.* The D614G mutation in the SARS-CoV-2 spike protein reduces S1  
21 shedding and increases infectivity. *bioRxiv*, 2020.2006.2012.148726, (2020).
- 22 65 Meier, F. *et al.* Online parallel accumulation – serial fragmentation (PASEF) with a novel  
23 trapped ion mobility mass spectrometer. *Molecular & Cellular Proteomics*,  
24 mcp.TIR118.000900, (2018).
- 25 66 Xu, T. *et al.* ProLuCID: An improved SEQUEST-like algorithm with enhanced sensitivity  
26 and specificity. *J Proteomics* **129**, 16-24, (2015).
- 27 67 Tabb, D. L., McDonald, W. H. & Yates, J. R., 3rd. DTASelect and Contrast: tools for  
28 assembling and comparing protein identifications from shotgun proteomics. *Journal of*  
29 *proteome research* **1**, 21-26, (2002).
- 30 68 Teo, G. *et al.* SAINTexpress: improvements and additional features in Significance  
31 Analysis of INTERactome software. *J Proteomics* **100**, 37-43, (2014).

32
